# Supplementary material for: Primary antibody deficiencies
Source: Springer Nature journal article supplement (doi:10.1038/nri3466), 2013-06-14
Supplement: 41577_2013_BFnri3466_MOESM15_ESM.pdf [file 41577_2013_BFnri3466_MOESM15_ESM.pdf]

Supplementary table 1 | **PADs related to B cell-intrinsic defects**

*B cell-intrinsic defects*

| PAD                                                           | Affected protein                    | Inheritance | Affected cell lineage                   | Other manifestations                     |
|---------------------------------------------------------------|-------------------------------------|-------------|-----------------------------------------|------------------------------------------|
| <b>I-B cell development defects</b>                           |                                     |             |                                         |                                          |
| agammaglobulinemia                                            | λ5, Cμ, Igα, Igβ, Pi3K (p85α), BLNK | AR          | B                                       |                                          |
|                                                               | BTK                                 | XL          | B                                       |                                          |
| SCID                                                          | ADA, RAG                            | AR          | B+T                                     |                                          |
|                                                               | AK2                                 | AR          | B+T+ PMN                                | deafness                                 |
|                                                               | components of NHEJ                  | AR          | B+T                                     |                                          |
| Dyskeratosis congenita (Hoyeraal–Hreidarsson)                 | Telomerase or shelterin complex     | AR or XL    | B+T                                     | multi-organ defects (cerebellum defects) |
| 'MonoMAC'/DCML deficiency                                     | GATA2                               | AR          | B+T+monocytes+ dendritic cells+NK cells |                                          |
| <b>II-B cell migration defects</b>                            |                                     |             |                                         |                                          |
| WHIM syndrome                                                 | CXCR4 (gain of function)            | AD          | B+PMN cells                             |                                          |
| Wiskott Aldrich syndrome WAS-like                             | WASP                                | XL          | B+T <sup>+</sup> platelets              |                                          |
|                                                               | WIP                                 | AR          | B+T <sup>+</sup> platelets              |                                          |
| Combined immunodeficiency                                     | DOCK8                               | AR          | B+T                                     |                                          |
|                                                               | MST1                                | AR          | B+T                                     |                                          |
| <b>III-B cell survival</b>                                    |                                     |             |                                         |                                          |
| Common variable immunodeficiency                              | BAFFR/TACI                          | AR/AR or AD | B                                       |                                          |
|                                                               | TWEAK                               | AD          | B (DN T, NK?)                           |                                          |
| <b>IV- B cell activation defects</b>                          |                                     |             |                                         |                                          |
| ICF syndrome                                                  | DNMT3B, ZBTB24                      | AR          | B+T                                     | multi-organ defects                      |
| hypogammaglobulinaemia                                        | CD19 complex, CD20                  | AR          | B                                       |                                          |
| combined immunodeficiency                                     | CARD11, IκBβ                        | AR          | B+T                                     |                                          |
|                                                               | CARD11 (gain of function)           | AD          | B                                       |                                          |
| Selective polysaccharide antibody deficiency                  | NEMO                                | XL          | B+T                                     | multi-organ defects                      |
|                                                               | IκBα (gain of function)             | AD          | B+T                                     | multi-organ defects                      |
|                                                               | HOIL1                               | AR          | B                                       | auto-inflammation                        |
|                                                               | ORAI1, STIM1                        | AR          | B+T                                     | Muscle defects                           |
|                                                               | LRBA                                | AR          | B+T                                     |                                          |
| PLCγ2 associated antibody deficiency and immune dysregulation | POLε                                | AR          | B+T                                     | Bone defects                             |
|                                                               | PLCγ2 (gain of function)            | AD          | B                                       | allergy, auto-immunity                   |
| <b>V-CSRD</b>                                                 |                                     |             |                                         |                                          |
| AT, NBS                                                       | CD40                                | AR          | B+T+monocytes                           |                                          |
|                                                               | AID                                 | AR (AD)     | B                                       |                                          |
|                                                               | UNG                                 | AR          | B                                       |                                          |
| SCID                                                          | PMS2                                | AR          | B+T                                     | multi-organ defects                      |
|                                                               | ATM, MRE11, NBS1, RNF168            | AR          | B+T                                     | multi-organ defects                      |
| SCID                                                          | Components of NHEJ                  | AR          | B+T                                     |                                          |

## SUPPLEMENTARY INFORMATION

|                                                                  |       |    |      |                                  |
|------------------------------------------------------------------|-------|----|------|----------------------------------|
| VI- Defective response to cytokines<br>combined immunodeficiency | IL21R | AR | B+T  |                                  |
| Hyper-IgE syndrome                                               | STAT3 | AD | B+T  | Bone and blood vessel<br>defects |
| Severe combined immunodeficiency                                 | γc    | XL | T+NK |                                  |
|                                                                  | Jak 3 | AR | T+NK |                                  |

AD: autosomal dominant, AR: autosomal recessive, AT: Ataxia-Telangiectasia, CSRD: class switch recombination deficiencies, CVID: common variable immunodeficiency, DCML-deficiency: dendritic cell, monocyte, B and NK lymphoid deficiency, DN T: double negative T cells, FLS: facial dysmorphism, immunodeficiency, livedo and short stature, HL: haematopoietic lineage, ICF: immunodeficiency, centromeric instability, facial anomalies, MonoMAC: monocytopenia, mycobacterial infections, NBS: Nijmegen breakage syndrome, NHEJ: Non homologous end joining, PMN: polymorphonuclear cells, SCID: severe combined immunodeficiency, WHIM: wharts, hypogammaglobulinaemia, infections and myelokathexis, XL: chromosome X-linked.
