# Supplementary material for: Primary antibody deficiencies
Source: Springer Nature journal article supplement (doi:10.1038/nri3466), 2013-06-14
Supplement: 41577_2013_BFnri3466_MOESM16_ESM.pdf [file 41577_2013_BFnri3466_MOESM16_ESM.pdf]

Supplementary table 2 | **PADs related to B cell-extrinsic defects**

| PAD                                       | Affected protein                                 | Inheritance | Affected cell lineage                        | Other manifestations          |
|-------------------------------------------|--------------------------------------------------|-------------|----------------------------------------------|-------------------------------|
| <b>I-Defective T cell differentiation</b> |                                                  |             |                                              |                               |
| Combined immunodeficiency                 | CD3 subunits, IL7R $\alpha$                      | AR          | T                                            |                               |
| Di George syndrome                        | 22q11.2deletion                                  | AD          | T                                            | multi-organ defects           |
| <b>II- Defective T cell function</b>      |                                                  |             |                                              |                               |
| Combined immunodeficiency                 | ZAP70, ITK, p56LCK                               | AR          | T                                            |                               |
|                                           | Regulatory factors of MHC class II transcription | AR          | T+B+monocytes+dendritic cells                |                               |
| <b>III- Defective T<sub>HH</sub></b>      |                                                  |             |                                              |                               |
| X lymphoproliferative and related disease | SAP                                              | XL          | T+B                                          |                               |
|                                           | CD27                                             | AR          | T+B+NK                                       |                               |
| Hyper-IgE syndrome                        | STAT3                                            | AD          | T+B                                          | Bone and blood vessel defects |
| CSRD                                      | CD40L                                            | XL          | T                                            |                               |
| CVID                                      | ICOS                                             | AR          | T                                            |                               |
| <b>IV- Innate immunity defect</b>         |                                                  |             |                                              |                               |
| TLR/IL1R signaling defect                 | IRAK4, MYD88, TIRAP                              | AR          | T+B <sup>+</sup> monocytes + dendritic cells | multi-organ defects           |

AD: autosomal dominant, AR: autosomal recessive, AT: Ataxia-Telangiectasia, CSRD: class switch recombination deficiencies, CVID: common variable immunodeficiency, DCML-deficiency: dendritic cell, monocyte, B and NK lymphoid deficiency, DN T: double negative T cells, FILS: facial dysmorphism, immunodeficiency, livedo and short stature, HL: haematopoietic lineage, ICF: immunodeficiency, centromeric instability, facial anomalies, MonoMAC: monocytopenia, mycobacterial infections, NBS: Nijmegen breakage syndrome, NHEJ: Non homologous end joining, PMN: polymorphonuclear cells, SCID: severe combined immunodeficiency, WHIM: wharts, hypogammaglobulinaemia, infections and myelokathexis, XL: chromosome X-linked.
